# Supplementary material
Source: Springer Nature journal article supplement (https://www.springermedizin.de/resource/supplementary/12865_2014_581_MOESM10_ESM.pdf/9428282)

## Carcass weight

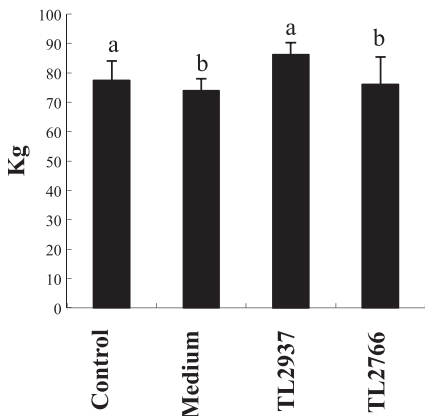

## Carcass backfat thickness

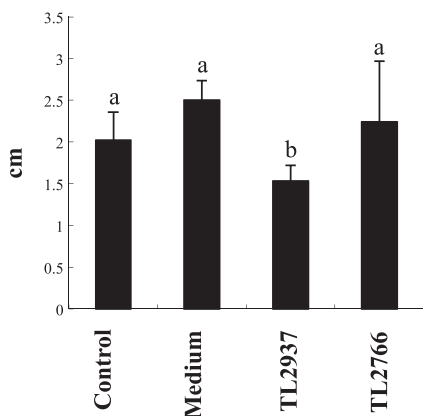

## Carcass grading

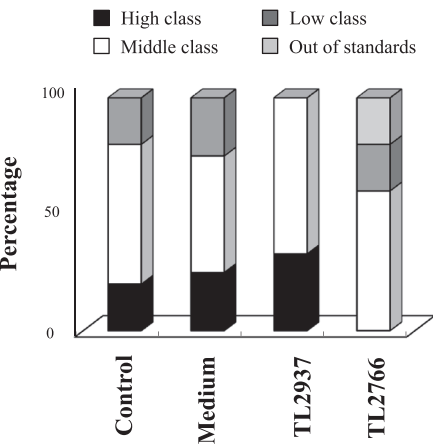

## Unsaturated fatty acids

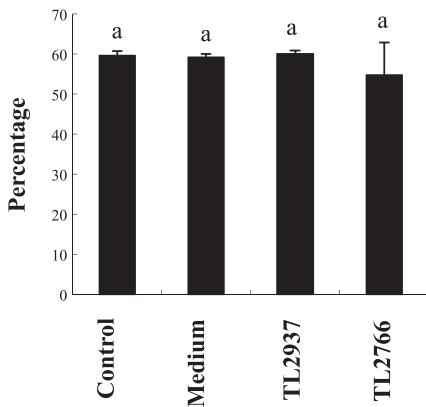

Supplement: MOESM10 [file 9428282]
